# Supplementary material for: Differential Effects of Somatostatin, Octreotide, and Lanreotide on Neuroendocrine Differentiation and Proliferation in Established and Primary NET Cell Lines: Possible Crosstalk with TGF-β Signaling
Source: MDPI journal article supplement (doi:10.3390/ijms232415868), 2022-12-14
Supplement: s1 [file s1]

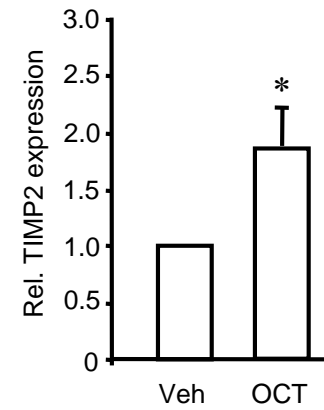

**Figure S1.** Upregulation of TIMP2 expression in OCT-treated BON cells. BON cells were challenged with either vehicle (Veh) or OCT (1  $\mu$ M) for 24 h, followed by RNA isolation and qPCR analysis. The data shown are the means  $\pm$  SD from three assays ( $n = 3$ ). Veh control cells are set arbitrarily at 1.0. The asterisk (\*) denotes a significant difference ( $p < 0.05$ , Wilcoxon test).
